# Supplementary material
Source: PubMed Central journal article supplement (PMC4064789)

# Supplemental Figure 1

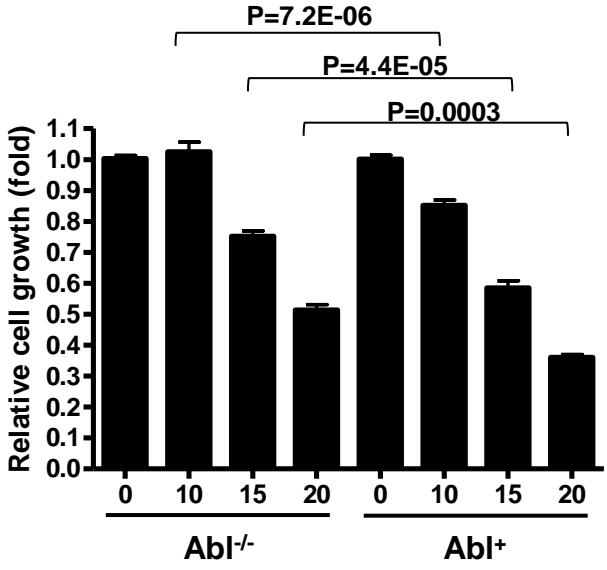

Supplement: NIHMS584119-supplement-supplement_1.pdf [file NIHMS584119-supplement-supplement_1.pdf]
